# Supplementary material for: Fungal and Mycotoxin Contamination of Green Leaf Spices Commercialized in Romania: A Food Choice Perspective
Source: MDPI journal article supplement (doi:10.3390/su152316437), 2023-11-30
Supplement: s1 [file s1]

**Figure S1.** – The calibration curves (HPLC standards) used for the quantification of mycotoxins from the green leaf spices.

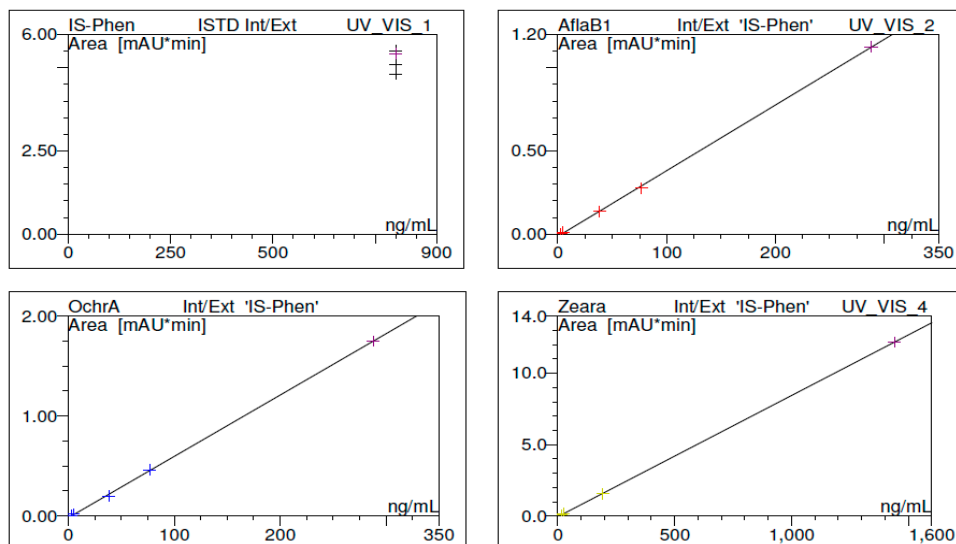

**Table S1.** – Comparison between the fungal load, mycotoxin content, humidity, and price of the samples. The statistically significant p values are marked in bold (the threshold for the p values is set at 0.05).

[illegible]
